# Supplementary material for: Different morphologies of self-assembled nanofibers fabricated with amphiphilic low-molecular-weight azopyridinium salts
Source: Royal Society of Chemistry journal article supplement (doi:10.1039/c3ra44065f), 2013-01-01
Supplement: c3ra44065f.pdf [file c3ra44065f.pdf]

Supporting information for

## Different Morphologies of Self-Assembled Nanofibers Fabricated With Amphiphilic Low-Molecular-Weight Azopyridinium Salts

Weimin Zhou<sup>2</sup> and Haifeng Yu<sup>1\*</sup>

<sup>1</sup> Address, Department of Materials Science and Engineering, College of Engineering, Peking University, Beijing 100871, China

E-mail: yuhaifeng@pku.edu.cn

<sup>2</sup> Address, Department of Materials Science and Technology, Nagaoka University of Technology, 1603-1 Kamitomioka, Nagaoka, 940-2188, Japan

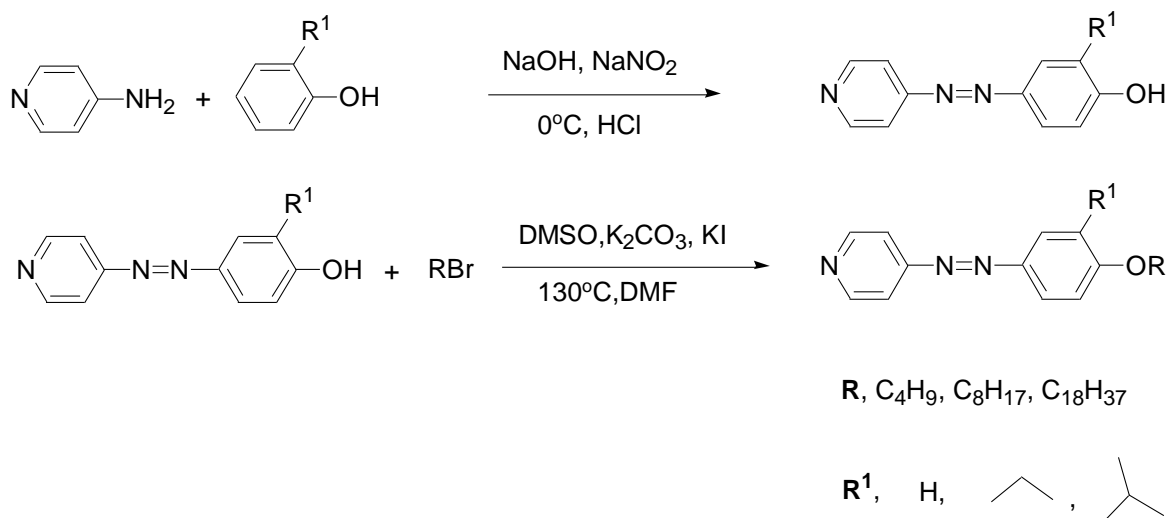

Scheme S1. The synthetic route of AzPy compounds.

### Fabrication of hybrid nanofibers.

For example, as shown in Figure S1, HCl (11 M, 0.05 mL) was added to a THF solution (1 mL) containing azopyridines (5 mg). The nanofibers were fabricated using these resulted solutions.

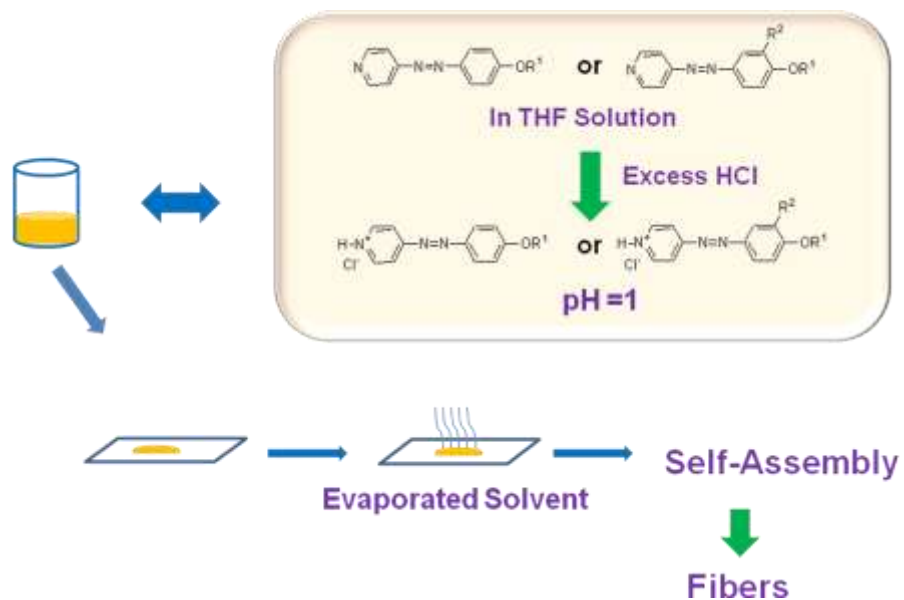

Fig. S1 Illustration of the fabrication processes of organic nanofibers.

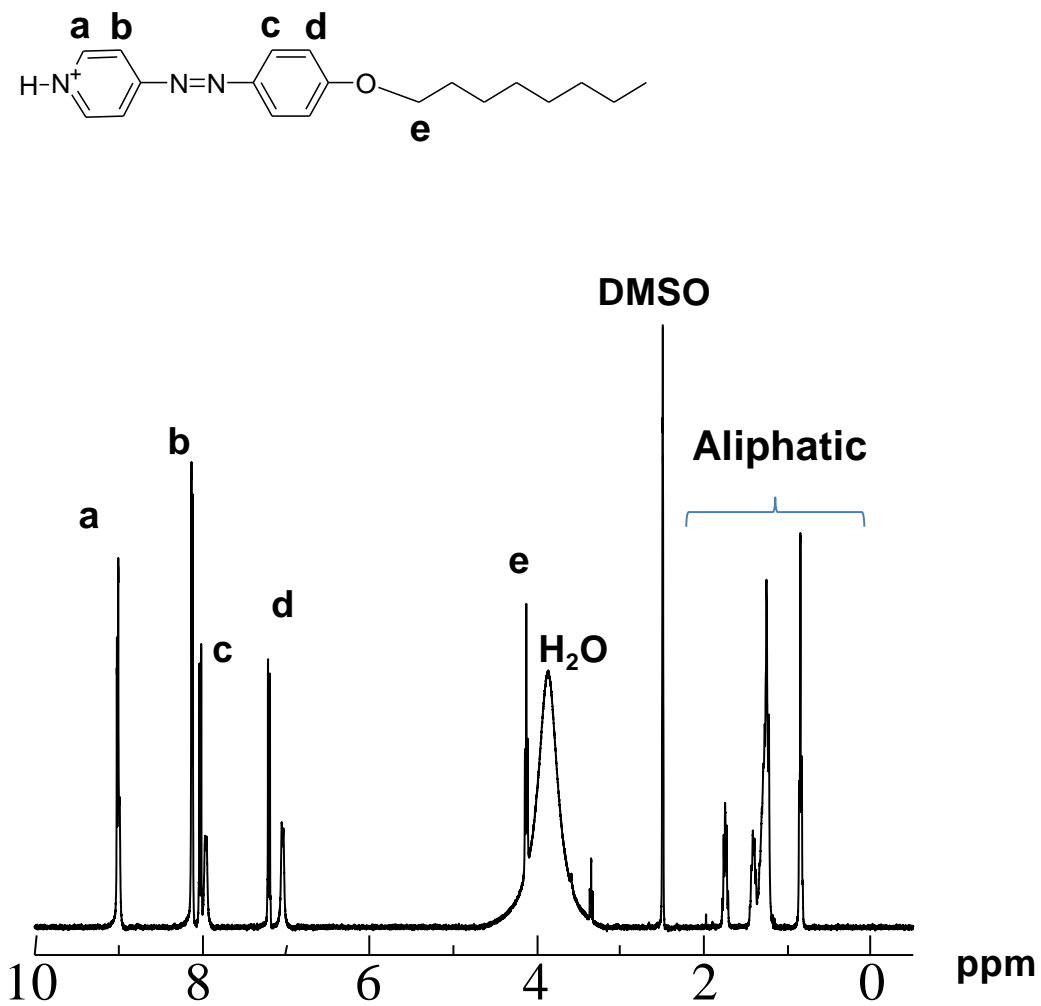

Fig. S2 <sup>1</sup>H NMR spectra of compound AzPyC8 in DMSO solution.

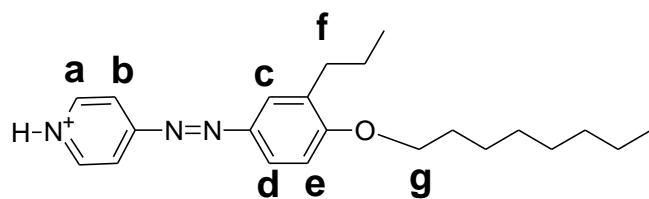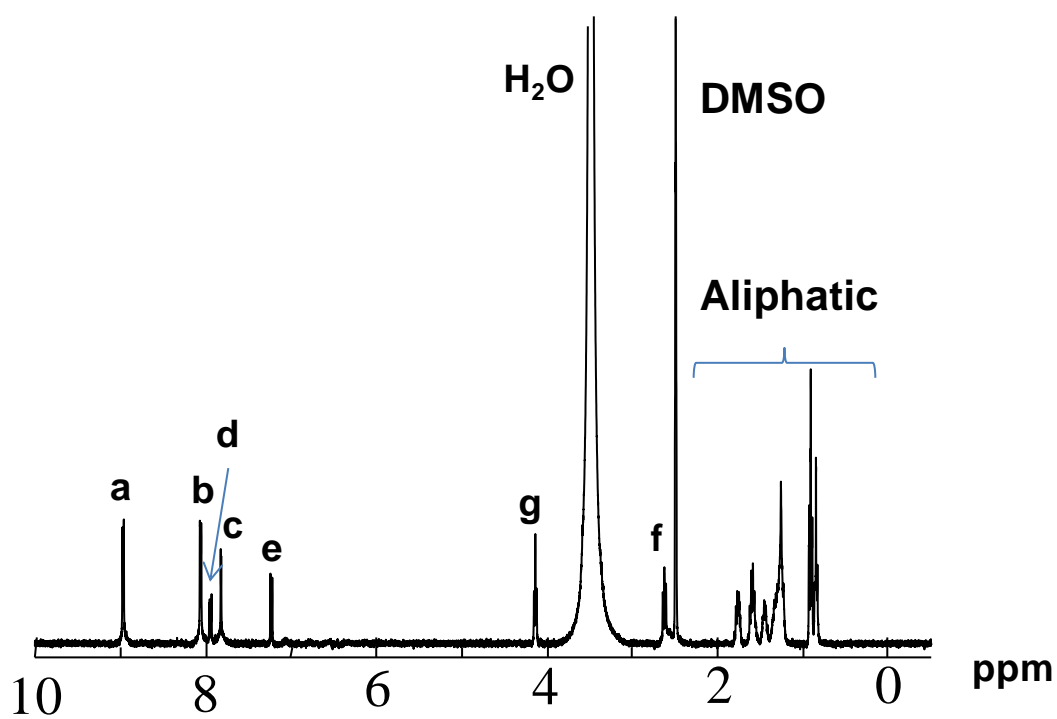

Fig. S3 <sup>1</sup>H NMR spectra of compound AzPyC8-1 in DMSO solution.

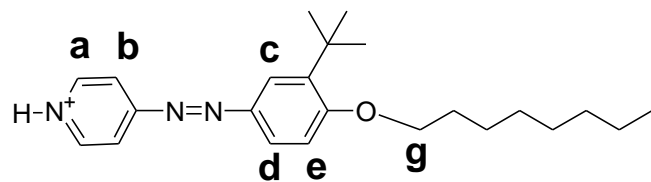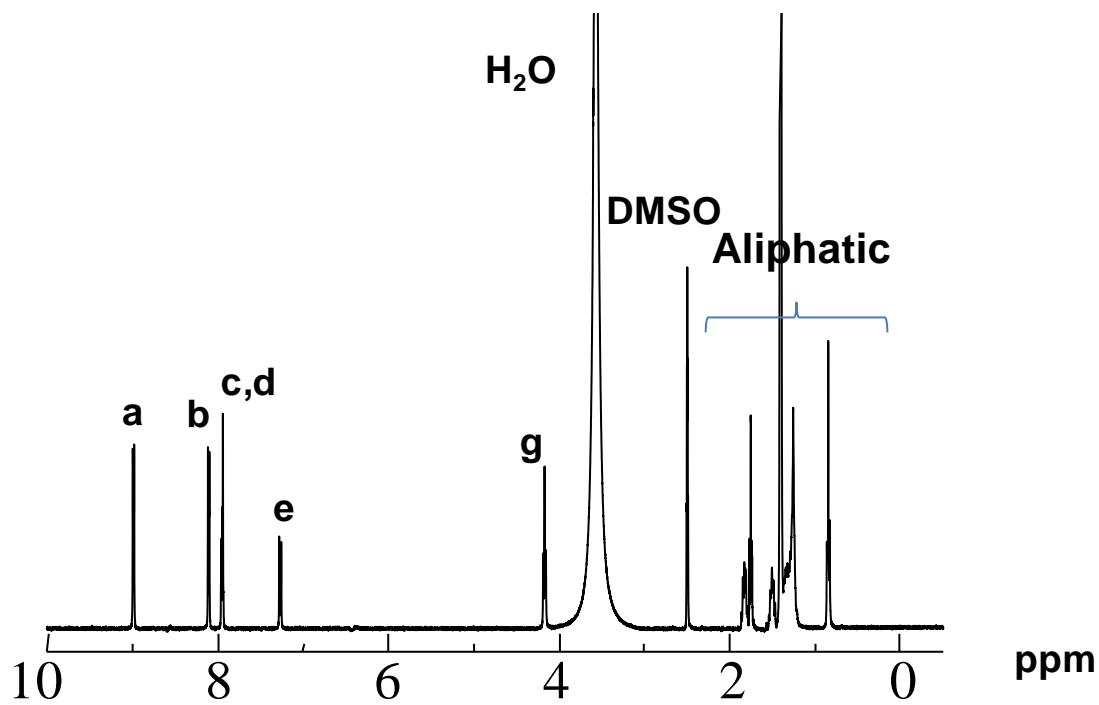

Fig. S4 <sup>1</sup>H NMR spectra of compound AzPyC8-2 in DMSO solution.

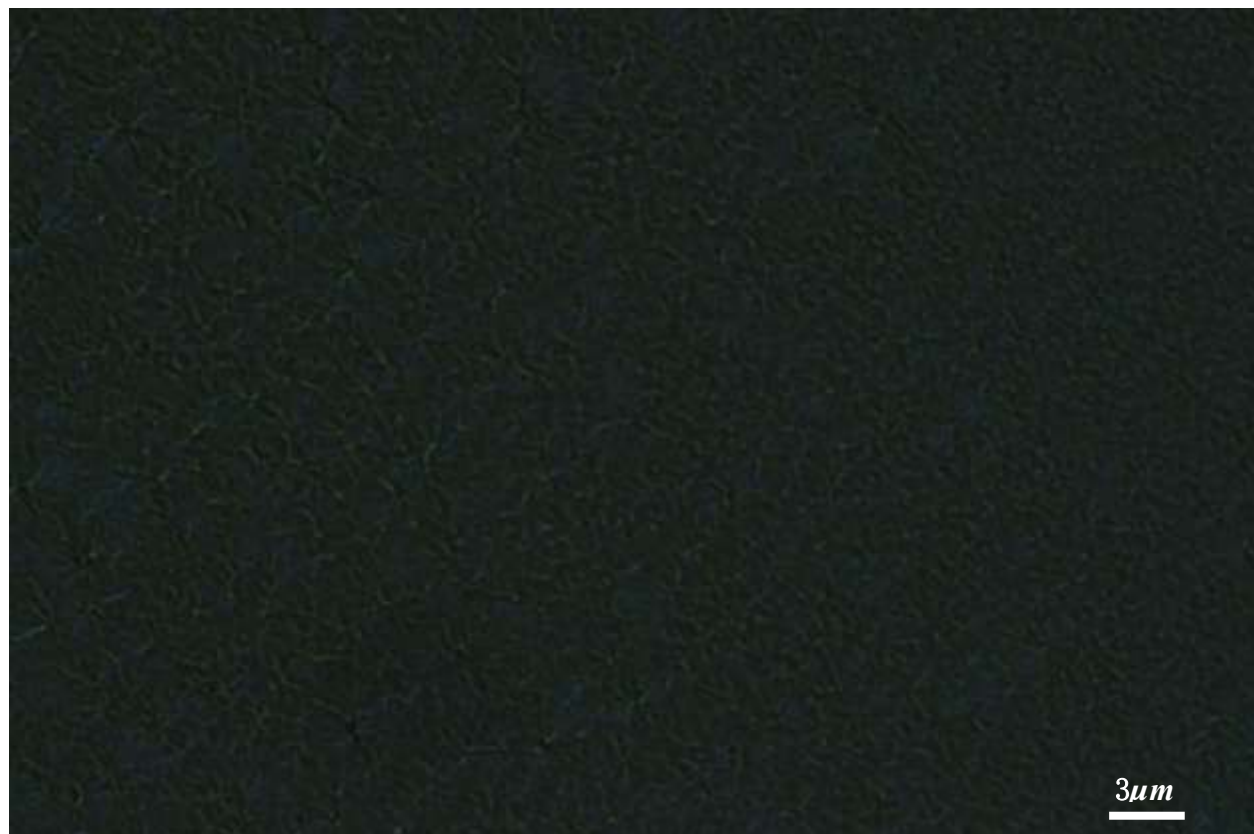

Fig. S5 POM image of nanofibers formed with AzPyC18.

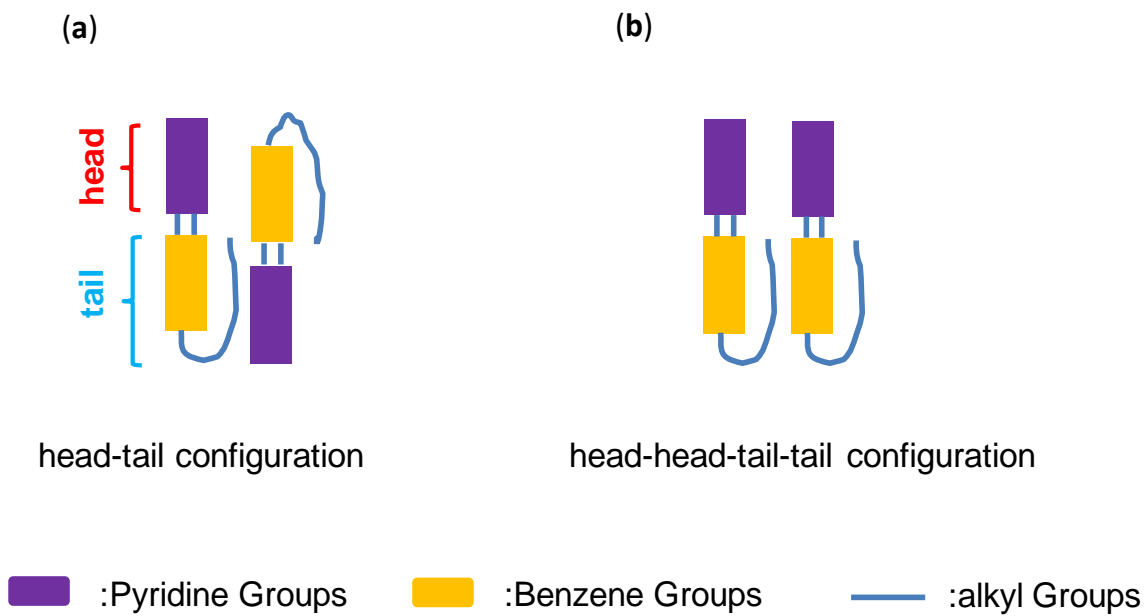

Fig. S6 Illustration of possible aggregation in LMW-AzPy nanofibers.
